# Supplementary material
Source: PubMed Central journal article supplement (PMC8638718)
Supplement: NIHMS1758903-supplement-Measure_Definitions.pdf [file NIHMS1758903-supplement-Measure_Definitions.pdf]

# Definitions of Measures

## Descriptive/Population

**Members enrolled:** Total number of members enrolled with accountable care benefits. Members enrolled is calculated monthly as the number of members with benefits in the month. As an annual measurement, the number is calculated as the average of the monthly members enrolled for the year.

- **Children:** The number of members enrolled aged under 18 years
- **Adults:** The number of members enrolled aged between 18 and 55 years
- **Seniors:** The number of members enrolled aged over 55 years

**Utilization rate:** The percentage of enrolled members that utilize their benefits. Calculated annually, this is the ratio of the number of members with a dental visit in the year out of the number of **members enrolled** for the year.

**Churn rate:** The percentage of enrolled members that lose their benefits. The number of members losing benefits is calculated monthly to provide a monthly churn rate (members lost in month / members enrolled at start of month). Calculated annually, this is the ratio of the total number of members lost per month in the year out of the average number of **members enrolled** per month.

**Patients with a visit:** The number of patients seen for a visit as recorded by the completion (or step towards completion) of a clinical procedure. Patients include enrolled members and non-members (or Fee-for-service patients).

**Visits:** The number of patient visits. A patient visit is a unique patient and date of service. Patients seen for multiple procedures on the same date are only counted as a single visit.

**Clinical Procedures:** The total number of clinical procedures completed. Clinical procedures include diagnostic, preventive, operative, endodontic, periodontal, removable and fixed prosthodontic, surgical and orthodontic procedures.

**Patients with an exam:** The number of patients seen for examination as recorded by a D0150, D0120 or D0145 procedure. As an annual measure, a patient is only counted once in this measure (even though patients may have multiple examination visits during the year).

- **Comprehensive Oral Exams:** The number of comprehensive oral exams completed during the year. Exams are recorded with the D0150 procedure code and typically used when performing a comprehensive exam of a new patient.
- **Periodic Oral Exams:** The number of periodic oral exams completed during the year. Exams are recorded with the D0120 procedure code and typically used when performing a regular examination of an existing patient under care.
- **Oral Evaluations (<3 yr old):** The number of knee-to-knee oral evaluations completed during the year. These exams are recorded with the D0145 procedure code and typically used when performing a knee-to-knee exam of a patient under the age of 3 years old.

## Process of Care Measures (PoCs)

**Patients with CRA at exam:** Number of patients seen for exam that had a Caries Risk Assessment completed at the exam. Caries Risk assessment is recorded by a provider-selected caries risk in the EHR. As an annual measurement, patients with multiple exams during the year are only recorded once in this measure, based on their highest recorded caries risk. If any of the exams included a CRA, then the patient is included as having a CRA at exam.

- **Low risk:** The number of patients assessed as Low Caries Risk
- **Moderate risk:** The number of patients assessed as Moderate Caries Risk
- **High risk:** The number of patients assessed as High Caries Risk
- **Extreme risk:** The number of patients assessed as Extreme Caries Risk

**Percent of patients with CRA at exam:** The percentage of patients seen for exam that had a Caries Risk Assessment completed at the exam. Ratio of **Patients with CRA at exam** out of **Patients with exam**.

- **Low risk:** The percentage of patients with CRA assessed as Low Caries Risk
- **Moderate risk:** The percentage of patients with CRA assessed as Moderate Caries Risk
- **High risk:** The percentage of patients with CRA assessed as High Caries Risk
- **Extreme risk:** The percentage of patients with CRA assessed as Extreme Caries Risk

**Provider Alignment with CRA:** The percentage of patients seen for exam that had a Caries Risk Assessment completed at the exam where the provider-selected CRA matched with the CAMBRA-suggested CRA. The CAMBRA-suggested CRA is calculated based on the validated CAMBRA form.

**Proactive Dental Care Plan:** The percentage of patients seen for exam that were provided with a Proactive Dental Care Plan during their visit.

## Appropriateness of Care Measures (AoCs)

**Radiographs Planned Interval:** The percentage of patients seen for an exam with an appropriate radiograph interval planned.

**Radiographs Taken (on interval):** The percentage of patients that had radiographs taken at or after the planned radiograph interval. Radiographs include a full mouth series or a bitewing series (2 or more bitewings taken), but do not include single bitewings, periapical or panoramic images. Radiographs taken earlier than 30 days prior to the planned radiograph interval date are considered outside of the interval. Radiographs taken “late” are included as appropriate as the circumstances may be beyond the provider’s control.

**Procedures in Phase:** The percentage of procedures that were completed within current phasing guidelines. Based on the patient’s phase on the date of service, guidelines indicate procedures that are appropriate.

**Fluoride Varnish (elevated risk):** The percentage of elevated (Moderate, High or Extreme) caries risk patients receiving topical fluoride at their exam. Measure based on the completion of a fluoride varnish procedure (D1206) on the date of exam.

**Silver Diamine Fluoride (elevated risk):** The percentage of elevated (High or Extreme) caries risk patients receiving Silver Diamine Fluoride (SDF) within 30 days of their exam. Measure based on the completion of SDF procedure (D1354) within 30 days of the exam.

## Outcome of Care Measures (AoCs)

### Untreated Decay

Measured as the percentage of patients with teeth (of any age) seen for exam with active cavitated carious lesions at the end of the calendar year (December 31).

**Qualifying Patients (with exam/teeth):** Number of patients with teeth seen for exam during the year.

**Patients with untreated decay at end of year:** Number of **Qualifying patients** (with teeth seen for exam during the year) that had active, untreated carious lesions at the end of the reporting year.

**Percent of patients with untreated decay:** The percentage of **Qualifying patients** with **Untreated decay** at the end of the reporting year.

- **3-5 years:** The percentage of patients aged 3-5 years seen for exam during the year with untreated decay in a primary tooth at the end of the year.
- **6-9 years:** The percentage of patients aged 6-9 years seen for exam during the year with untreated decay in any tooth at the end of the year.
- **35-44 years:** The percentage of patients aged 35-44 years seen for exam during the year with untreated decay at the end of the year. Note that the HP 2020 measure and baseline and target goals are based on coronal caries. The reported data for the Willamette program includes both coronal and root caries.
- **65-74 years:** The percentage of patients aged 65-74 years seen for exam during the year with untreated decay at the end of the year. Note that the HP 2020 measure and baseline and target goals are based on coronal caries. The reported data for the Willamette program includes both coronal and root caries.
- **75 years and older:** The percentage of patients aged 75 years and older seen for exam during the year with untreated decay at the end of the year.

### New Decay

Measured as the percentage of patients with teeth (of any age) seen for exam who experienced new tooth decay during the year.

**Qualifying patients (with prior exam):** Number of patients with teeth seen for exam during the year and had a previous exam within the prior 3 years.

**Patients with new decay:** Number of **Qualifying patients** (with teeth seen for exam during the year and a prior exam) that were identified with an incidence of new tooth decay. New tooth decay must have been diagnosed during the year, and includes newly decayed teeth represented with active decay, restored due to decay or extracted due to decay.

**Percent of patients with new decay:** The percentage of **Qualifying patients** with **New decay** during the year.

- **Low caries risk:** The percentage of low CRA patients with new decay during the year.
- **Moderate caries risk:** The percentage of moderate CRA patients with new decay during the year.
- **High caries risk:** The percentage of high CRA patients with new decay during the year.
- **Extreme caries risk:** The percentage of extreme CRA patients with new decay during the year.
