# Supplementary material
Source: PubMed Central journal article supplement (PMC8638718)
Supplement: NIHMS1758903-supplement-Tables.pdf [file NIHMS1758903-supplement-Tables.pdf]

## Supplemental online materials PoC, and OoC Tables

Process of Care Measures (PoC) of Willamette Dental Group Caries Preventive Care Program from 2014 through 2019

| Process of Care Measures (PoC)                            | Program Year |         |         |         |         |         | Average (SD)     |
|-----------------------------------------------------------|--------------|---------|---------|---------|---------|---------|------------------|
|                                                           | 2014         | 2015    | 2016    | 2017    | 2018    | 2019    |                  |
| <b>Patients with Caries Risk Assessment (CRA) at exam</b> | 180,836      | 187,869 | 195,830 | 211,062 | 222,610 | 237,047 | 205,876 (21,590) |
| <b>Low risk</b>                                           | 110,432      | 121,948 | 128,179 | 136,414 | 136,675 | 138,384 | 128,672 (10,922) |
| <b>Moderate risk</b>                                      | 27,896       | 27,412  | 28,591  | 33,893  | 41,161  | 47,777  | 34,455 (8,364)   |
| <b>High risk</b>                                          | 41,032       | 37,551  | 38,291  | 40,092  | 44,147  | 50,230  | 41,891 (4,699)   |
| <b>Extreme risk</b>                                       | 1,476        | 958     | 769     | 663     | 627     | 656     | 858 (326)        |
| <b>Percent of patients with CRA</b>                       | 98.4%        | 98.6%   | 98.5%   | 98.3%   | 98.2%   | 98.1%   | 98.3% (0.2)      |
| <b>Low risk</b>                                           | 61.1%        | 64.9%   | 65.5%   | 64.6%   | 61.4%   | 58.4%   | 62.6% (2.8)      |
| <b>Moderate risk</b>                                      | 15.4%        | 14.6%   | 14.6%   | 16.1%   | 18.5%   | 20.2%   | 16.6% (2.3)      |
| <b>High risk</b>                                          | 22.7%        | 20.0%   | 19.6%   | 19.0%   | 19.8%   | 21.2%   | 20.4% (1.3)      |
| <b>Extreme risk</b>                                       | 0.8%         | 0.5%    | 0.4%    | 0.3%    | 0.3%    | 0.3%    | 0.4% (0.2)       |
| <b>Provider Alignment with CRA</b>                        | 91.7%        | 91.1%   | 91.1%   | 89.1%   | 88.4%   | 89.7%   | 90.2% (1.3)      |
| <b>Proactive Dental Care Plan</b>                         | 96.9%        | 97.2%   | 97.2%   | 96.8%   | 96.8%   | 96.7%   | 96.9% (0.2)      |

Untreated decay and new decay Outcome of Care Measures (OoC) of Willamette Dental Group Caries Preventive Care Program from 2014 through 2019, with Healthy People 2020 Baseline and Target measures for untreated decay for comparison

| Outcome of Care (OoC)                                   | Program Year |         |         |         |         |         | Average (SD)        | Healthy People 2020 |        |
|---------------------------------------------------------|--------------|---------|---------|---------|---------|---------|---------------------|---------------------|--------|
|                                                         | 2014         | 2015    | 2016    | 2017    | 2018    | 2019    |                     | Baseline            | Target |
| <b>Qualifying Patients with exam/teeth</b>              | 180,905      | 188,640 | 197,220 | 213,524 | 225,856 | 240,821 | 207,828<br>(23,028) | n/a                 | n/a    |
| <b>Patients with untreated decay at end of year</b>     | 21,071       | 20,748  | 21,856  | 23,366  | 25,454  | 27,989  | 23,414 (2,833)      | n/a                 | n/a    |
| <b>Percent of patients with untreated decay</b>         | 11.6%        | 11.0%   | 11.1%   | 10.9%   | 11.3%   | 11.6%   | 11.3% (0.3)         | n/a                 | n/a    |
| 3-5 years primary teeth                                 | 13.2%        | 13.3%   | 12.4%   | 10.5%   | 9.6%    | 12.1%   | 11.8% (1.5)         | 23.8%               | 21.4%  |
| 6-9 years primary or permanent teeth                    | 14.4%        | 13.9%   | 14.3%   | 13.2%   | 12.5%   | 14.3%   | 13.8% (0.8)         | 28.8%               | 25.9%  |
| 13-15 years permanent teeth                             | 6.2%         | 5.8%    | 5.9%    | 6.6%    | 6.9%    | 7.3%    | 6.4% (0.6)          | 17.0%               | 15.3%  |
| 35-44 years                                             | 11.2%        | 10.4%   | 10.7%   | 10.6%   | 11.2%   | 11.1%   | 10.9% (0.4)         | 27.8%*              | 25.0%* |
| 65-74 years                                             | 7.9%         | 8.2%    | 7.9%    | 8.3%    | 8.3%    | 8.7%    | 8.2% (0.3)          | 17.1%*              | 15.4%* |
| 75 years and older                                      | 12.1%        | 12.6%   | 10.1%   | 10.8%   | 11.1%   | 12.4%   | 11.5% (1.0)         | 37.9%               | 34.1%  |
| <b>Qualifying Patients with prior exam</b>              | 82,050       | 117,038 | 127,209 | 137,907 | 145,394 | 159,012 | 128,102<br>(26,813) | n/a                 | n/a    |
| <b>Patients with new decay</b>                          | 11,008       | 15,774  | 17,331  | 17,993  | 19,842  | 23,079  | 17,505 (4,050)      | n/a                 | n/a    |
| <b>Percent of patients with new decay</b>               | 13.4%        | 13.5%   | 13.6%   | 13.0%   | 13.6%   | 14.5%   | 13.6% (0.5)         | n/a                 | n/a    |
| Percent of low caries risk patients with new decay      | 6.7%         | 6.8%    | 7.7%    | 7.5%    | 7.9%    | 8.2%    | 7.5% (0.6)          | n/a                 | n/a    |
| Percent of moderate caries risk patients with new decay | 14.2%        | 17.1%   | 19.4%   | 20.0%   | 20.8%   | 21.1%   | 18.8% (2.7)         | n/a                 | n/a    |
| Percent of high caries risk patients with new decay     | 24.5%        | 28.6%   | 30.3%   | 29.7%   | 31.3%   | 32.1%   | 29.4% (2.7)         | n/a                 | n/a    |
| Percent of extreme caries risk patients with new decay  | 28.9%        | 26.7%   | 27.1%   | 31.1%   | 25.9%   | 28.8%   | 28.1% (1.9)         | n/a                 | n/a    |

\*HP 2020 baseline and target are based on coronal caries only (excluding root caries). WD Program data includes root caries.
